# Supplementary material for: Isotropic 25-Micron 3D Neuroimaging Using ex vivo Microstructural Manganese-Enhanced MRI (MEMRI)
Source: PubMed Central journal article supplement (PMC6291442; doi:10.3389/fncir.2018.00110), 2018-12-06
Supplement: Image_1.pdf [file Image_1.pdf]

**Isotropic 25-micron 3D neuroimaging using *ex vivo* microstructural manganese-enhanced MRI (MEMRI)**

Chika Sato, Kazuhiko Sawada, David K. Wright, Tatsuya Higashi, Ichio Aoki

**Supplementary Figures and Figure Legends**

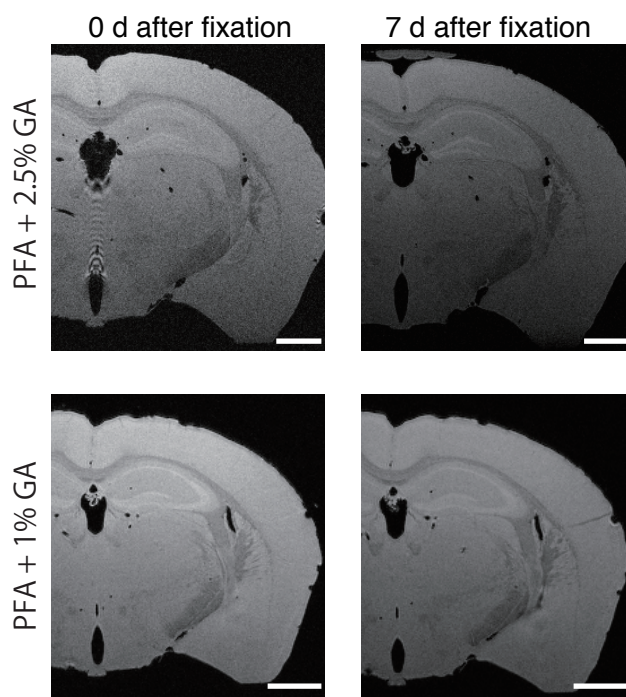

**Supplementary Figure S1**

**Supplementary Figure S1. Longitudinal Observation of preserved Mn in *ex vivo* brain with different fixative solution.** The T1-weighted images obtained through *ex vivo* Mn-enhanced MRI shortly after fixation (left column, as same as Figure 1C) and 7 days after fixation (right column) were shown. We used 4% PFA including 2.5% GA (top), or in 1% GA (bottom) as fixative solution. PFA: paraformaldehyde, GA: glutaraldehyde. Scale bar: 1 mm.
